# Supplementary material
Source: PubMed Central journal article supplement (PMC3695042)
Supplement: NIHMS434499-supplement-01.pdf [file NIHMS434499-supplement-01.pdf]

## Supplementary References (1-3)

- 1 Danielsen ER, Ross, B. *Magnetic resonance spectroscopy diagnosis of neurological diseases*. 1999; Marcel Dekker, Inc.: New York, NY.
- 2 Preacher K, Hayes, A. SPSS and SAS procedures for estimating indirect effects in simple mediation models. *Behav Res Meth Instrum Copmut* 2004;36:717-31.
- 3 Baron RM, Kenny DA. The moderator-mediator variable distinction in social psychological research: conceptual, strategic, and statistical considerations. *J Pers Soc Psychol* 1986;51:1173-82.
